# Supplementary material for: Determination of the minimum soil infiltration rate of sunken green space considering the annual runoff collection ratio, sunken depth and sunken green space area of Hefei city, China
Source: PLoS One. 2024 Mar 5;19(3):e0299630. doi: 10.1371/journal.pone.0299630 (PMC10914258; doi:10.1371/journal.pone.0299630)
Supplement: S1 Data — (XLS) [file pone.0299630.s001.xls]

## Sheet: Sheet1
Time	Precipiation（mm）
1975-01-01	1
1975-01-02	NULL
1975-01-03	NULL
1975-01-04	NULL
1975-01-05	NULL
1975-01-06	NULL
1975-01-07	1.4
1975-01-08	NULL
1975-01-09	NULL
1975-01-10	NULL
1975-01-11	NULL
1975-01-12	NULL
1975-01-13	NULL
1975-01-14	NULL
1975-01-15	0.3
1975-01-16	NULL
1975-01-17	NULL
1975-01-18	NULL
1975-01-19	NULL
1975-01-20	NULL
1975-01-21	NULL
1975-01-22	NULL
1975-01-23	NULL
1975-01-24	NULL
1975-01-25	2.3
1975-01-26	2.1
1975-01-27	NULL
1975-01-28	NULL
1975-01-29	NULL
1975-01-30	NULL
1975-01-31	2.7
1975-02-01	6.2
1975-02-02	14
1975-02-03	10
1975-02-04	1.2
1975-02-05	2.4
1975-02-06	4
1975-02-07	NULL
1975-02-08	NULL
1975-02-09	NULL
1975-02-10	NULL
1975-02-11	NULL
1975-02-12	NULL
1975-02-13	1.1
1975-02-14	1
1975-02-15	NULL
1975-02-16	NULL
1975-02-17	NULL
1975-02-18	NULL
1975-02-19	NULL
1975-02-20	NULL
1975-02-21	NULL
1975-02-22	NULL
1975-02-23	NULL
1975-02-24	NULL
1975-02-25	1
1975-02-26	3.2
1975-02-27	NULL
1975-02-28	0.7
1975-03-01	NULL
1975-03-02	0.9
1975-03-03	9.8
1975-03-04	16.6
1975-03-05	NULL
1975-03-06	NULL
1975-03-07	NULL
1975-03-08	0.3
1975-03-09	NULL
1975-03-10	NULL
1975-03-11	NULL
1975-03-12	NULL
1975-03-13	1
1975-03-14	NULL
1975-03-15	NULL
1975-03-16	NULL
1975-03-17	NULL
1975-03-18	5.6
1975-03-19	NULL
1975-03-20	NULL
1975-03-21	NULL
1975-03-22	0.1
1975-03-23	NULL
1975-03-24	NULL
1975-03-25	NULL
1975-03-26	1.3
1975-03-27	1
1975-03-28	NULL
1975-03-29	NULL
1975-03-30	NULL
1975-03-31	NULL
1975-04-01	NULL
1975-04-02	NULL
1975-04-03	NULL
1975-04-04	5.9
1975-04-05	NULL
1975-04-06	0.4
1975-04-07	21.8
1975-04-08	NULL
1975-04-09	NULL
1975-04-10	NULL
1975-04-11	NULL
1975-04-12	NULL
1975-04-13	NULL
1975-04-14	NULL
1975-04-15	NULL
1975-04-16	2.5
1975-04-17	26.3
1975-04-18	20.6
1975-04-19	9.6
1975-04-20	NULL
1975-04-21	1.6
1975-04-22	1.5
1975-04-23	NULL
1975-04-24	NULL
1975-04-25	15.2
1975-04-26	NULL
1975-04-27	15.1
1975-04-28	NULL
1975-04-29	NULL
1975-04-30	4.3
1975-05-01	3.9
1975-05-02	0.6
1975-05-03	5.6
1975-05-04	NULL
1975-05-05	NULL
1975-05-06	0.1
1975-05-07	6.4
1975-05-08	0.9
1975-05-09	NULL
1975-05-10	NULL
1975-05-11	NULL
1975-05-12	3.6
1975-05-13	NULL
1975-05-14	0.2
1975-05-15	17.8
1975-05-16	NULL
1975-05-17	0.5
1975-05-18	NULL
1975-05-19	NULL
1975-05-20	NULL
1975-05-21	NULL
1975-05-22	NULL
1975-05-23	NULL
1975-05-24	1.6
1975-05-25	NULL
1975-05-26	NULL
1975-05-27	NULL
1975-05-28	NULL
1975-05-29	NULL
1975-05-30	NULL
1975-05-31	NULL
1975-06-01	NULL
1975-06-02	9.2
1975-06-03	91.6
1975-06-04	NULL
1975-06-05	NULL
1975-06-06	NULL
1975-06-07	NULL
1975-06-08	NULL
1975-06-09	NULL
1975-06-10	NULL
1975-06-11	NULL
1975-06-12	NULL
1975-06-13	NULL
1975-06-14	NULL
1975-06-15	NULL
1975-06-16	4.7
1975-06-17	NULL
1975-06-18	NULL
1975-06-19	NULL
1975-06-20	26.9
1975-06-21	55.2
1975-06-22	NULL
1975-06-23	0.9
1975-06-24	48.5
1975-06-25	0.9
1975-06-26	8.3
1975-06-27	5
1975-06-28	NULL
1975-06-29	18.6
1975-06-30	63.9
1975-07-01	1.6
1975-07-02	NULL
1975-07-03	17.1
1975-07-04	39.3
1975-07-05	2.8
1975-07-06	NULL
1975-07-07	NULL
1975-07-08	3
1975-07-09	0.2
1975-07-10	NULL
1975-07-11	NULL
1975-07-12	NULL
1975-07-13	1.8
1975-07-14	2.7
1975-07-15	NULL
1975-07-16	0.7
1975-07-17	NULL
1975-07-18	NULL
1975-07-19	NULL
1975-07-20	NULL
1975-07-21	NULL
1975-07-22	NULL
1975-07-23	NULL
1975-07-24	NULL
1975-07-25	NULL
1975-07-26	0.6
1975-07-27	48
1975-07-28	NULL
1975-07-29	11.1
1975-07-30	NULL
1975-07-31	NULL
1975-08-01	NULL
1975-08-02	7.3
1975-08-03	0.4
1975-08-04	4.5
1975-08-05	NULL
1975-08-06	NULL
1975-08-07	NULL
1975-08-08	NULL
1975-08-09	NULL
1975-08-10	NULL
1975-08-11	NULL
1975-08-12	6.3
1975-08-13	0.2
1975-08-14	44
1975-08-15	69.2
1975-08-16	16
1975-08-17	NULL
1975-08-18	7.9
1975-08-19	3.5
1975-08-20	NULL
1975-08-21	NULL
1975-08-22	3
1975-08-23	NULL
1975-08-24	NULL
1975-08-25	NULL
1975-08-26	NULL
1975-08-27	49.7
1975-08-28	NULL
1975-08-29	NULL
1975-08-30	NULL
1975-08-31	NULL
1975-09-01	NULL
1975-09-02	5
1975-09-03	NULL
1975-09-04	NULL
1975-09-05	NULL
1975-09-06	NULL
1975-09-07	NULL
1975-09-08	NULL
1975-09-09	NULL
1975-09-10	NULL
1975-09-11	NULL
1975-09-12	28.9
1975-09-13	24.4
1975-09-14	35.7
1975-09-15	1.5
1975-09-16	NULL
1975-09-17	NULL
1975-09-18	NULL
1975-09-19	5
1975-09-20	NULL
1975-09-21	NULL
1975-09-22	NULL
1975-09-23	NULL
1975-09-24	2.1
1975-09-25	9.5
1975-09-26	47.6
1975-09-27	0.5
1975-09-28	8.1
1975-09-29	0.2
1975-09-30	NULL
1975-10-01	NULL
1975-10-02	NULL
1975-10-03	11.3
1975-10-04	0.2
1975-10-05	NULL
1975-10-06	9.3
1975-10-07	NULL
1975-10-08	NULL
1975-10-09	NULL
1975-10-10	83.4
1975-10-11	56.7
1975-10-12	5.2
1975-10-13	0.6
1975-10-14	0.8
1975-10-15	NULL
1975-10-16	NULL
1975-10-17	NULL
1975-10-18	NULL
1975-10-19	NULL
1975-10-20	NULL
1975-10-21	NULL
1975-10-22	NULL
1975-10-23	9.9
1975-10-24	42
1975-10-25	11.2
1975-10-26	NULL
1975-10-27	0.6
1975-10-28	11.2
1975-10-29	NULL
1975-10-30	NULL
1975-10-31	NULL
1975-11-01	NULL
1975-11-02	1.6
1975-11-03	5.6
1975-11-04	5.2
1975-11-05	5.9
1975-11-06	NULL
1975-11-07	NULL
1975-11-08	NULL
1975-11-09	NULL
1975-11-10	7
1975-11-11	5.2
1975-11-12	1.3
1975-11-13	NULL
1975-11-14	NULL
1975-11-15	NULL
1975-11-16	NULL
1975-11-17	NULL
1975-11-18	0.9
1975-11-19	NULL
1975-11-20	NULL
1975-11-21	NULL
1975-11-22	NULL
1975-11-23	NULL
1975-11-24	NULL
1975-11-25	NULL
1975-11-26	NULL
1975-11-27	NULL
1975-11-28	NULL
1975-11-29	NULL
1975-11-30	NULL
1975-12-01	NULL
1975-12-02	NULL
1975-12-03	0.9
1975-12-04	0.1
1975-12-05	17.8
1975-12-06	12.4
1975-12-07	10.2
1975-12-08	6.8
1975-12-09	0.4
1975-12-10	NULL
1975-12-11	NULL
1975-12-12	NULL
1975-12-13	NULL
1975-12-14	NULL
1975-12-15	NULL
1975-12-16	NULL
1975-12-17	NULL
1975-12-18	NULL
1975-12-19	NULL
1975-12-20	NULL
1975-12-21	NULL
1975-12-22	NULL
1975-12-23	NULL
1975-12-24	NULL
1975-12-25	NULL
1975-12-26	NULL
1975-12-27	NULL
1975-12-28	NULL
1975-12-29	NULL
1975-12-30	NULL
1975-12-31	NULL
1976-01-01	NULL
1976-01-02	NULL
1976-01-03	NULL
1976-01-04	NULL
1976-01-05	NULL
1976-01-06	NULL
1976-01-07	NULL
1976-01-08	NULL
1976-01-09	NULL
1976-01-10	NULL
1976-01-11	NULL
1976-01-12	NULL
1976-01-13	NULL
1976-01-14	NULL
1976-01-15	NULL
1976-01-16	NULL
1976-01-17	NULL
1976-01-18	NULL
1976-01-19	NULL
1976-01-20	NULL
1976-01-21	NULL
1976-01-22	NULL
1976-01-23	NULL
1976-01-24	NULL
1976-01-25	9
1976-01-26	NULL
1976-01-27	NULL
1976-01-28	1
1976-01-29	NULL
1976-01-30	NULL
1976-01-31	NULL
1976-02-01	NULL
1976-02-02	NULL
1976-02-03	NULL
1976-02-04	NULL
1976-02-05	NULL
1976-02-06	NULL
1976-02-07	NULL
1976-02-08	0.2
1976-02-09	NULL
1976-02-10	NULL
1976-02-11	2
1976-02-12	24.2
1976-02-13	3.9
1976-02-14	0.8
1976-02-15	15.6
1976-02-16	14.8
1976-02-17	2.6
1976-02-18	NULL
1976-02-19	NULL
1976-02-20	8.7
1976-02-21	3.5
1976-02-22	NULL
1976-02-23	NULL
1976-02-24	NULL
1976-02-25	NULL
1976-02-26	5.8
1976-02-27	7
1976-02-28	NULL
1976-02-29	NULL
1976-03-01	NULL
1976-03-02	NULL
1976-03-03	NULL
1976-03-04	NULL
1976-03-05	NULL
1976-03-06	0.8
1976-03-07	0.9
1976-03-08	NULL
1976-03-09	0.4
1976-03-10	4.8
1976-03-11	3.7
1976-03-12	NULL
1976-03-13	NULL
1976-03-14	0.4
1976-03-15	7.1
1976-03-16	4.1
1976-03-17	11.2
1976-03-18	0.9
1976-03-19	NULL
1976-03-20	NULL
1976-03-21	NULL
1976-03-22	NULL
1976-03-23	NULL
1976-03-24	NULL
1976-03-25	0.5
1976-03-26	NULL
1976-03-27	NULL
1976-03-28	4
1976-03-29	2.4
1976-03-30	NULL
1976-03-31	NULL
1976-04-01	NULL
1976-04-02	1.9
1976-04-03	NULL
1976-04-04	NULL
1976-04-05	NULL
1976-04-06	NULL
1976-04-07	4.5
1976-04-08	NULL
1976-04-09	NULL
1976-04-10	NULL
1976-04-11	6.5
1976-04-12	7.8
1976-04-13	NULL
1976-04-14	NULL
1976-04-15	NULL
1976-04-16	NULL
1976-04-17	4.4
1976-04-18	0.2
1976-04-19	1.6
1976-04-20	NULL
1976-04-21	NULL
1976-04-22	2.8
1976-04-23	NULL
1976-04-24	NULL
1976-04-25	NULL
1976-04-26	NULL
1976-04-27	1.9
1976-04-28	24.5
1976-04-29	NULL
1976-04-30	NULL
1976-05-01	1.4
1976-05-02	NULL
1976-05-03	NULL
1976-05-04	NULL
1976-05-05	NULL
1976-05-06	NULL
1976-05-07	NULL
1976-05-08	NULL
1976-05-09	NULL
1976-05-10	24.8
1976-05-11	NULL
1976-05-12	NULL
1976-05-13	NULL
1976-05-14	2.7
1976-05-15	NULL
1976-05-16	NULL
1976-05-17	22.8
1976-05-18	NULL
1976-05-19	NULL
1976-05-20	0.1
1976-05-21	0.1
1976-05-22	NULL
1976-05-23	0.1
1976-05-24	NULL
1976-05-25	NULL
1976-05-26	NULL
1976-05-27	54.7
1976-05-28	5
1976-05-29	NULL
1976-05-30	NULL
1976-05-31	23.1
1976-06-01	0.9
1976-06-02	NULL
1976-06-03	NULL
1976-06-04	NULL
1976-06-05	NULL
1976-06-06	NULL
1976-06-07	25
1976-06-08	NULL
1976-06-09	NULL
1976-06-10	NULL
1976-06-11	NULL
1976-06-12	NULL
1976-06-13	NULL
1976-06-14	NULL
1976-06-15	NULL
1976-06-16	0.4
1976-06-17	0.9
1976-06-18	NULL
1976-06-19	NULL
1976-06-20	NULL
1976-06-21	37.7
1976-06-22	26.4
1976-06-23	3.8
1976-06-24	NULL
1976-06-25	NULL
1976-06-26	NULL
1976-06-27	NULL
1976-06-28	NULL
1976-06-29	19.1
1976-06-30	NULL
1976-07-01	0.5
1976-07-02	NULL
1976-07-03	NULL
1976-07-04	NULL
1976-07-05	NULL
1976-07-06	NULL
1976-07-07	16.1
1976-07-08	3.1
1976-07-09	NULL
1976-07-10	NULL
1976-07-11	5.7
1976-07-12	NULL
1976-07-13	1.4
1976-07-14	8.5
1976-07-15	1.8
1976-07-16	NULL
1976-07-17	NULL
1976-07-18	NULL
1976-07-19	NULL
1976-07-20	NULL
1976-07-21	NULL
1976-07-22	9.4
1976-07-23	NULL
1976-07-24	NULL
1976-07-25	NULL
1976-07-26	NULL
1976-07-27	NULL
1976-07-28	NULL
1976-07-29	NULL
1976-07-30	NULL
1976-07-31	NULL
1976-08-01	NULL
1976-08-02	NULL
1976-08-03	NULL
1976-08-04	NULL
1976-08-05	NULL
1976-08-06	NULL
1976-08-07	NULL
1976-08-08	NULL
1976-08-09	15.8
1976-08-10	NULL
1976-08-11	NULL
1976-08-12	1.6
1976-08-13	0.2
1976-08-14	0.4
1976-08-15	NULL
1976-08-16	NULL
1976-08-17	NULL
1976-08-18	NULL
1976-08-19	NULL
1976-08-20	NULL
1976-08-21	NULL
1976-08-22	NULL
1976-08-23	NULL
1976-08-24	0.4
1976-08-25	36.2
1976-08-26	2.9
1976-08-27	56.4
1976-08-28	24.3
1976-08-29	NULL
1976-08-30	2.9
1976-08-31	NULL
1976-09-01	24
1976-09-02	11
1976-09-03	NULL
1976-09-04	NULL
1976-09-05	3.9
1976-09-06	0.6
1976-09-07	NULL
1976-09-08	NULL
1976-09-09	NULL
1976-09-10	NULL
1976-09-11	NULL
1976-09-12	NULL
1976-09-13	NULL
1976-09-14	NULL
1976-09-15	NULL
1976-09-16	NULL
1976-09-17	NULL
1976-09-18	2.3
1976-09-19	0.8
1976-09-20	NULL
1976-09-21	NULL
1976-09-22	NULL
1976-09-23	NULL
1976-09-24	NULL
1976-09-25	NULL
1976-09-26	NULL
1976-09-27	NULL
1976-09-28	NULL
1976-09-29	NULL
1976-09-30	NULL
1976-10-01	0.2
1976-10-02	0.1
1976-10-03	NULL
1976-10-04	NULL
1976-10-05	NULL
1976-10-06	NULL
1976-10-07	6.1
1976-10-08	NULL
1976-10-09	NULL
1976-10-10	NULL
1976-10-11	0.8
1976-10-12	0.3
1976-10-13	NULL
1976-10-14	NULL
1976-10-15	NULL
1976-10-16	NULL
1976-10-17	NULL
1976-10-18	NULL
1976-10-19	NULL
1976-10-20	NULL
1976-10-21	NULL
1976-10-22	8.4
1976-10-23	21.2
1976-10-24	NULL
1976-10-25	NULL
1976-10-26	14.2
1976-10-27	NULL
1976-10-28	NULL
1976-10-29	NULL
1976-10-30	NULL
1976-10-31	NULL
1976-11-01	NULL
1976-11-02	NULL
1976-11-03	7.1
1976-11-04	NULL
1976-11-05	NULL
1976-11-06	NULL
1976-11-07	NULL
1976-11-08	NULL
1976-11-09	0.3
1976-11-10	3.2
1976-11-11	NULL
1976-11-12	6.1
1976-11-13	NULL
1976-11-14	NULL
1976-11-15	NULL
1976-11-16	6.9
1976-11-17	NULL
1976-11-18	NULL
1976-11-19	NULL
1976-11-20	NULL
1976-11-21	NULL
1976-11-22	NULL
1976-11-23	NULL
1976-11-24	NULL
1976-11-25	NULL
1976-11-26	NULL
1976-11-27	NULL
1976-11-28	NULL
1976-11-29	NULL
1976-11-30	NULL
1976-12-01	NULL
1976-12-02	NULL
1976-12-03	NULL
1976-12-04	NULL
1976-12-05	NULL
1976-12-06	NULL
1976-12-07	NULL
1976-12-08	NULL
1976-12-09	NULL
1976-12-10	NULL
1976-12-11	NULL
1976-12-12	NULL
1976-12-13	NULL
1976-12-14	NULL
1976-12-15	NULL
1976-12-16	NULL
1976-12-17	NULL
1976-12-18	NULL
1976-12-19	NULL
1976-12-20	NULL
1976-12-21	NULL
1976-12-22	NULL
1976-12-23	3.7
1976-12-24	3.2
1976-12-25	NULL
1976-12-26	NULL
1976-12-27	NULL
1976-12-28	NULL
1976-12-29	NULL
1976-12-30	NULL
1976-12-31	NULL
1977-01-01	2.9
1977-01-02	0.5
1977-01-03	NULL
1977-01-04	NULL
1977-01-05	NULL
1977-01-06	NULL
1977-01-07	0.3
1977-01-08	0.1
1977-01-09	NULL
1977-01-10	NULL
1977-01-11	NULL
1977-01-12	NULL
1977-01-13	NULL
1977-01-14	NULL
1977-01-15	NULL
1977-01-16	0.5
1977-01-17	5.7
1977-01-18	0.2
1977-01-19	0.3
1977-01-20	NULL
1977-01-21	4.9
1977-01-22	NULL
1977-01-23	NULL
1977-01-24	NULL
1977-01-25	0.9
1977-01-26	NULL
1977-01-27	1
1977-01-28	0.1
1977-01-29	6
1977-01-30	NULL
1977-01-31	NULL
1977-02-01	NULL
1977-02-02	NULL
1977-02-03	NULL
1977-02-04	NULL
1977-02-05	NULL
1977-02-06	NULL
1977-02-07	NULL
1977-02-08	10.7
1977-02-09	NULL
1977-02-10	NULL
1977-02-11	NULL
1977-02-12	0.4
1977-02-13	NULL
1977-02-14	NULL
1977-02-15	NULL
1977-02-16	NULL
1977-02-17	NULL
1977-02-18	NULL
1977-02-19	NULL
1977-02-20	NULL
1977-02-21	NULL
1977-02-22	NULL
1977-02-23	NULL
1977-02-24	0.7
1977-02-25	0.1
1977-02-26	NULL
1977-02-27	NULL
1977-02-28	NULL
1977-03-01	0.3
1977-03-02	NULL
1977-03-03	NULL
1977-03-04	NULL
1977-03-05	NULL
1977-03-06	NULL
1977-03-07	NULL
1977-03-08	NULL
1977-03-09	NULL
1977-03-10	11.4
1977-03-11	NULL
1977-03-12	10.4
1977-03-13	NULL
1977-03-14	9.4
1977-03-15	34.6
1977-03-16	NULL
1977-03-17	8.7
1977-03-18	9.1
1977-03-19	NULL
1977-03-20	1.1
1977-03-21	1.1
1977-03-22	NULL
1977-03-23	2.4
1977-03-24	NULL
1977-03-25	NULL
1977-03-26	NULL
1977-03-27	NULL
1977-03-28	26.6
1977-03-29	1.3
1977-03-30	NULL
1977-03-31	NULL
1977-04-01	NULL
1977-04-02	NULL
1977-04-03	0.7
1977-04-04	3.7
1977-04-05	25.7
1977-04-06	NULL
1977-04-07	4.8
1977-04-08	2.8
1977-04-09	NULL
1977-04-10	0.1
1977-04-11	0.1
1977-04-12	NULL
1977-04-13	0.8
1977-04-14	5.1
1977-04-15	NULL
1977-04-16	35
1977-04-17	NULL
1977-04-18	NULL
1977-04-19	NULL
1977-04-20	NULL
1977-04-21	NULL
1977-04-22	3.2
1977-04-23	22.3
1977-04-24	NULL
1977-04-25	NULL
1977-04-26	11.8
1977-04-27	15.3
1977-04-28	NULL
1977-04-29	0.5
1977-04-30	9.7
1977-05-01	10.1
1977-05-02	26.6
1977-05-03	70.7
1977-05-04	28
1977-05-05	NULL
1977-05-06	3.2
1977-05-07	3.9
1977-05-08	10.6
1977-05-09	NULL
1977-05-10	NULL
1977-05-11	NULL
1977-05-12	NULL
1977-05-13	6
1977-05-14	NULL
1977-05-15	NULL
1977-05-16	NULL
1977-05-17	NULL
1977-05-18	0.2
1977-05-19	NULL
1977-05-20	7
1977-05-21	NULL
1977-05-22	NULL
1977-05-23	2.3
1977-05-24	4.8
1977-05-25	NULL
1977-05-26	NULL
1977-05-27	NULL
1977-05-28	0.6
1977-05-29	NULL
1977-05-30	NULL
1977-05-31	13.9
1977-06-01	0.2
1977-06-02	NULL
1977-06-03	NULL
1977-06-04	NULL
1977-06-05	NULL
1977-06-06	NULL
1977-06-07	NULL
1977-06-08	7
1977-06-09	0.6
1977-06-10	NULL
1977-06-11	NULL
1977-06-12	0.2
1977-06-13	0.2
1977-06-14	24.1
1977-06-15	1.3
1977-06-16	0.1
1977-06-17	NULL
1977-06-18	0.4
1977-06-19	NULL
1977-06-20	NULL
1977-06-21	NULL
1977-06-22	0.1
1977-06-23	1.2
1977-06-24	NULL
1977-06-25	NULL
1977-06-26	NULL
1977-06-27	NULL
1977-06-28	0.4
1977-06-29	3.2
1977-06-30	NULL
1977-07-01	NULL
1977-07-02	NULL
1977-07-03	0.4
1977-07-04	0.5
1977-07-05	NULL
1977-07-06	NULL
1977-07-07	NULL
1977-07-08	0.2
1977-07-09	NULL
1977-07-10	NULL
1977-07-11	5.4
1977-07-12	NULL
1977-07-13	NULL
1977-07-14	NULL
1977-07-15	NULL
1977-07-16	78.2
1977-07-17	4.1
1977-07-18	46.6
1977-07-19	10.9
1977-07-20	3
1977-07-21	1.1
1977-07-22	NULL
1977-07-23	NULL
1977-07-24	NULL
1977-07-25	NULL
1977-07-26	NULL
1977-07-27	7.8
1977-07-28	19.4
1977-07-29	5.7
1977-07-30	NULL
1977-07-31	NULL
1977-08-01	NULL
1977-08-02	NULL
1977-08-03	NULL
1977-08-04	NULL
1977-08-05	NULL
1977-08-06	NULL
1977-08-07	NULL
1977-08-08	1
1977-08-09	NULL
1977-08-10	1
1977-08-11	NULL
1977-08-12	38.3
1977-08-13	NULL
1977-08-14	21.2
1977-08-15	NULL
1977-08-16	NULL
1977-08-17	NULL
1977-08-18	NULL
1977-08-19	NULL
1977-08-20	NULL
1977-08-21	NULL
1977-08-22	6.5
1977-08-23	2.6
1977-08-24	NULL
1977-08-25	11.1
1977-08-26	NULL
1977-08-27	NULL
1977-08-28	7.4
1977-08-29	8.7
1977-08-30	0.3
1977-08-31	NULL
1977-09-01	NULL
1977-09-02	NULL
1977-09-03	NULL
1977-09-04	NULL
1977-09-05	NULL
1977-09-06	NULL
1977-09-07	3.8
1977-09-08	NULL
1977-09-09	NULL
1977-09-10	NULL
1977-09-11	7.1
1977-09-12	NULL
1977-09-13	23.5
1977-09-14	12.1
1977-09-15	19.1
1977-09-16	NULL
1977-09-17	NULL
1977-09-18	NULL
1977-09-19	NULL
1977-09-20	NULL
1977-09-21	NULL
1977-09-22	NULL
1977-09-23	6.3
1977-09-24	8.2
1977-09-25	76.8
1977-09-26	6.7
1977-09-27	0.8
1977-09-28	NULL
1977-09-29	NULL
1977-09-30	NULL
1977-10-01	NULL
1977-10-02	NULL
1977-10-03	NULL
1977-10-04	NULL
1977-10-05	20.1
1977-10-06	35.2
1977-10-07	NULL
1977-10-08	NULL
1977-10-09	NULL
1977-10-10	NULL
1977-10-11	NULL
1977-10-12	NULL
1977-10-13	NULL
1977-10-14	NULL
1977-10-15	NULL
1977-10-16	NULL
1977-10-17	NULL
1977-10-18	NULL
1977-10-19	NULL
1977-10-20	NULL
1977-10-21	NULL
1977-10-22	NULL
1977-10-23	NULL
1977-10-24	NULL
1977-10-25	NULL
1977-10-26	5.8
1977-10-27	0.1
1977-10-28	1.6
1977-10-29	NULL
1977-10-30	NULL
1977-10-31	1.3
1977-11-01	NULL
1977-11-02	NULL
1977-11-03	NULL
1977-11-04	NULL
1977-11-05	NULL
1977-11-06	30.6
1977-11-07	26.4
1977-11-08	NULL
1977-11-09	NULL
1977-11-10	NULL
1977-11-11	NULL
1977-11-12	NULL
1977-11-13	NULL
1977-11-14	NULL
1977-11-15	NULL
1977-11-16	NULL
1977-11-17	NULL
1977-11-18	NULL
1977-11-19	NULL
1977-11-20	NULL
1977-11-21	NULL
1977-11-22	NULL
1977-11-23	NULL
1977-11-24	NULL
1977-11-25	NULL
1977-11-26	NULL
1977-11-27	NULL
1977-11-28	NULL
1977-11-29	NULL
1977-11-30	NULL
1977-12-01	NULL
1977-12-02	NULL
1977-12-03	NULL
1977-12-04	NULL
1977-12-05	NULL
1977-12-06	NULL
1977-12-07	NULL
1977-12-08	NULL
1977-12-09	NULL
1977-12-10	NULL
1977-12-11	NULL
1977-12-12	NULL
1977-12-13	NULL
1977-12-14	NULL
1977-12-15	NULL
1977-12-16	NULL
1977-12-17	NULL
1977-12-18	NULL
1977-12-19	NULL
1977-12-20	4.1
1977-12-21	1.1
1977-12-22	5.4
1977-12-23	NULL
1977-12-24	NULL
1977-12-25	NULL
1977-12-26	NULL
1977-12-27	3
1977-12-28	2.9
1977-12-29	17.9
1977-12-30	12
1977-12-31	NULL
1978-01-01	NULL
1978-01-02	NULL
1978-01-03	NULL
1978-01-04	NULL
1978-01-05	NULL
1978-01-06	NULL
1978-01-07	NULL
1978-01-08	NULL
1978-01-09	NULL
1978-01-10	NULL
1978-01-11	NULL
1978-01-12	1.3
1978-01-13	2
1978-01-14	3.9
1978-01-15	3.7
1978-01-16	NULL
1978-01-17	NULL
1978-01-18	NULL
1978-01-19	NULL
1978-01-20	NULL
1978-01-21	NULL
1978-01-22	NULL
1978-01-23	0.4
1978-01-24	NULL
1978-01-25	NULL
1978-01-26	NULL
1978-01-27	11.9
1978-01-28	0.5
1978-01-29	0.1
1978-01-30	NULL
1978-01-31	NULL
1978-02-01	NULL
1978-02-02	NULL
1978-02-03	NULL
1978-02-04	2.1
1978-02-05	3.1
1978-02-06	3.2
1978-02-07	13
1978-02-08	9.9
1978-02-09	8.8
1978-02-10	5.5
1978-02-11	0.2
1978-02-12	NULL
1978-02-13	NULL
1978-02-14	NULL
1978-02-15	NULL
1978-02-16	NULL
1978-02-17	NULL
1978-02-18	NULL
1978-02-19	NULL
1978-02-20	NULL
1978-02-21	NULL
1978-02-22	NULL
1978-02-23	NULL
1978-02-24	NULL
1978-02-25	NULL
1978-02-26	NULL
1978-02-27	NULL
1978-02-28	NULL
1978-03-01	NULL
1978-03-02	11.8
1978-03-03	2.2
1978-03-04	NULL
1978-03-05	NULL
1978-03-06	NULL
1978-03-07	0.1
1978-03-08	6.2
1978-03-09	NULL
1978-03-10	NULL
1978-03-11	NULL
1978-03-12	NULL
1978-03-13	NULL
1978-03-14	NULL
1978-03-15	NULL
1978-03-16	NULL
1978-03-17	NULL
1978-03-18	NULL
1978-03-19	17.9
1978-03-20	10.3
1978-03-21	NULL
1978-03-22	NULL
1978-03-23	NULL
1978-03-24	NULL
1978-03-25	NULL
1978-03-26	NULL
1978-03-27	NULL
1978-03-28	NULL
1978-03-29	5.4
1978-03-30	0.4
1978-03-31	NULL
1978-04-01	NULL
1978-04-02	NULL
1978-04-03	NULL
1978-04-04	NULL
1978-04-05	NULL
1978-04-06	NULL
1978-04-07	NULL
1978-04-08	NULL
1978-04-09	NULL
1978-04-10	NULL
1978-04-11	NULL
1978-04-12	NULL
1978-04-13	NULL
1978-04-14	7.2
1978-04-15	0.3
1978-04-16	NULL
1978-04-17	NULL
1978-04-18	NULL
1978-04-19	1.4
1978-04-20	4.7
1978-04-21	NULL
1978-04-22	NULL
1978-04-23	NULL
1978-04-24	NULL
1978-04-25	NULL
1978-04-26	NULL
1978-04-27	5.2
1978-04-28	NULL
1978-04-29	NULL
1978-04-30	NULL
1978-05-01	NULL
1978-05-02	NULL
1978-05-03	NULL
1978-05-04	NULL
1978-05-05	10.5
1978-05-06	NULL
1978-05-07	NULL
1978-05-08	10.4
1978-05-09	0.7
1978-05-10	NULL
1978-05-11	NULL
1978-05-12	NULL
1978-05-13	NULL
1978-05-14	NULL
1978-05-15	NULL
1978-05-16	0.3
1978-05-17	4.4
1978-05-18	NULL
1978-05-19	NULL
1978-05-20	NULL
1978-05-21	NULL
1978-05-22	NULL
1978-05-23	NULL
1978-05-24	NULL
1978-05-25	NULL
1978-05-26	0.8
1978-05-27	15.3
1978-05-28	1.8
1978-05-29	0.4
1978-05-30	20
1978-05-31	0.1
1978-06-01	NULL
1978-06-02	NULL
1978-06-03	NULL
1978-06-04	NULL
1978-06-05	NULL
1978-06-06	NULL
1978-06-07	NULL
1978-06-08	12.7
1978-06-09	0.2
1978-06-10	NULL
1978-06-11	NULL
1978-06-12	NULL
1978-06-13	NULL
1978-06-14	3
1978-06-15	NULL
1978-06-16	NULL
1978-06-17	0.2
1978-06-18	NULL
1978-06-19	NULL
1978-06-20	NULL
1978-06-21	NULL
1978-06-22	NULL
1978-06-23	72.9
1978-06-24	25.8
1978-06-25	3.8
1978-06-26	NULL
1978-06-27	NULL
1978-06-28	NULL
1978-06-29	NULL
1978-06-30	NULL
1978-07-01	NULL
1978-07-02	NULL
1978-07-03	NULL
1978-07-04	NULL
1978-07-05	NULL
1978-07-06	NULL
1978-07-07	NULL
1978-07-08	NULL
1978-07-09	NULL
1978-07-10	NULL
1978-07-11	0.8
1978-07-12	NULL
1978-07-13	NULL
1978-07-14	NULL
1978-07-15	1.4
1978-07-16	0.7
1978-07-17	6
1978-07-18	NULL
1978-07-19	6.2
1978-07-20	NULL
1978-07-21	NULL
1978-07-22	NULL
1978-07-23	23.2
1978-07-24	7
1978-07-25	NULL
1978-07-26	NULL
1978-07-27	NULL
1978-07-28	NULL
1978-07-29	NULL
1978-07-30	NULL
1978-07-31	NULL
1978-08-01	NULL
1978-08-02	NULL
1978-08-03	NULL
1978-08-04	NULL
1978-08-05	NULL
1978-08-06	10.9
1978-08-07	NULL
1978-08-08	NULL
1978-08-09	NULL
1978-08-10	NULL
1978-08-11	1.6
1978-08-12	NULL
1978-08-13	NULL
1978-08-14	NULL
1978-08-15	2.6
1978-08-16	0.5
1978-08-17	NULL
1978-08-18	NULL
1978-08-19	NULL
1978-08-20	NULL
1978-08-21	NULL
1978-08-22	NULL
1978-08-23	NULL
1978-08-24	1.5
1978-08-25	NULL
1978-08-26	NULL
1978-08-27	NULL
1978-08-28	NULL
1978-08-29	NULL
1978-08-30	0.1
1978-08-31	NULL
1978-09-01	NULL
1978-09-02	NULL
1978-09-03	NULL
1978-09-04	NULL
1978-09-05	NULL
1978-09-06	NULL
1978-09-07	NULL
1978-09-08	1.4
1978-09-09	0.7
1978-09-10	NULL
1978-09-11	NULL
1978-09-12	NULL
1978-09-13	NULL
1978-09-14	NULL
1978-09-15	NULL
1978-09-16	NULL
1978-09-17	NULL
1978-09-18	4.2
1978-09-19	NULL
1978-09-20	NULL
1978-09-21	NULL
1978-09-22	NULL
1978-09-23	NULL
1978-09-24	NULL
1978-09-25	NULL
1978-09-26	NULL
1978-09-27	1
1978-09-28	0.7
1978-09-29	NULL
1978-09-30	NULL
1978-10-01	NULL
1978-10-02	NULL
1978-10-03	11.1
1978-10-04	4.9
1978-10-05	NULL
1978-10-06	NULL
1978-10-07	NULL
1978-10-08	NULL
1978-10-09	NULL
1978-10-10	NULL
1978-10-11	NULL
1978-10-12	NULL
1978-10-13	NULL
1978-10-14	NULL
1978-10-15	NULL
1978-10-16	NULL
1978-10-17	NULL
1978-10-18	NULL
1978-10-19	NULL
1978-10-20	NULL
1978-10-21	1.6
1978-10-22	NULL
1978-10-23	NULL
1978-10-24	NULL
1978-10-25	0.6
1978-10-26	1.2
1978-10-27	4.1
1978-10-28	NULL
1978-10-29	NULL
1978-10-30	NULL
1978-10-31	NULL
1978-11-01	NULL
1978-11-02	NULL
1978-11-03	NULL
1978-11-04	NULL
1978-11-05	0.4
1978-11-06	NULL
1978-11-07	NULL
1978-11-08	2.4
1978-11-09	13.5
1978-11-10	16.5
1978-11-11	14.9
1978-11-12	0.5
1978-11-13	NULL
1978-11-14	4.6
1978-11-15	5.3
1978-11-16	NULL
1978-11-17	NULL
1978-11-18	NULL
1978-11-19	NULL
1978-11-20	NULL
1978-11-21	3.1
1978-11-22	0.5
1978-11-23	NULL
1978-11-24	0.2
1978-11-25	NULL
1978-11-26	NULL
1978-11-27	NULL
1978-11-28	NULL
1978-11-29	NULL
1978-11-30	NULL
1978-12-01	NULL
1978-12-02	NULL
1978-12-03	NULL
1978-12-04	NULL
1978-12-05	NULL
1978-12-06	NULL
1978-12-07	NULL
1978-12-08	NULL
1978-12-09	11.4
1978-12-10	NULL
1978-12-11	NULL
1978-12-12	NULL
1978-12-13	NULL
1978-12-14	NULL
1978-12-15	NULL
1978-12-16	NULL
1978-12-17	NULL
1978-12-18	NULL
1978-12-19	NULL
1978-12-20	NULL
1978-12-21	NULL
1978-12-22	NULL
1978-12-23	NULL
1978-12-24	NULL
1978-12-25	NULL
1978-12-26	0.3
1978-12-27	2.8
1978-12-28	NULL
1978-12-29	NULL
1978-12-30	1.1
1978-12-31	0.5
1979-01-01	NULL
1979-01-02	0.2
1979-01-03	NULL
1979-01-04	NULL
1979-01-05	0.1
1979-01-06	NULL
1979-01-07	NULL
1979-01-08	NULL
1979-01-09	NULL
1979-01-10	NULL
1979-01-11	12.6
1979-01-12	NULL
1979-01-13	0.1
1979-01-14	NULL
1979-01-15	NULL
1979-01-16	NULL
1979-01-17	NULL
1979-01-18	NULL
1979-01-19	NULL
1979-01-20	NULL
1979-01-21	NULL
1979-01-22	NULL
1979-01-23	NULL
1979-01-24	NULL
1979-01-25	NULL
1979-01-26	NULL
1979-01-27	NULL
1979-01-28	9.9
1979-01-29	0.2
1979-01-30	3.5
1979-01-31	NULL
1979-02-01	NULL
1979-02-02	NULL
1979-02-03	NULL
1979-02-04	NULL
1979-02-05	NULL
1979-02-06	NULL
1979-02-07	NULL
1979-02-08	NULL
1979-02-09	1.6
1979-02-10	NULL
1979-02-11	NULL
1979-02-12	NULL
1979-02-13	NULL
1979-02-14	NULL
1979-02-15	NULL
1979-02-16	NULL
1979-02-17	NULL
1979-02-18	NULL
1979-02-19	NULL
1979-02-20	NULL
1979-02-21	15.4
1979-02-22	6.6
1979-02-23	NULL
1979-02-24	NULL
1979-02-25	NULL
1979-02-26	NULL
1979-02-27	NULL
1979-02-28	NULL
1979-03-01	NULL
1979-03-02	NULL
1979-03-03	NULL
1979-03-04	NULL
1979-03-05	NULL
1979-03-06	NULL
1979-03-07	NULL
1979-03-08	NULL
1979-03-09	1.9
1979-03-10	6.2
1979-03-11	NULL
1979-03-12	NULL
1979-03-13	NULL
1979-03-14	NULL
1979-03-15	NULL
1979-03-16	NULL
1979-03-17	NULL
1979-03-18	NULL
1979-03-19	NULL
1979-03-20	NULL
1979-03-21	NULL
1979-03-22	NULL
1979-03-23	NULL
1979-03-24	NULL
1979-03-25	NULL
1979-03-26	NULL
1979-03-27	NULL
1979-03-28	NULL
1979-03-29	5.1
1979-03-30	21.5
1979-03-31	45
1979-04-01	0.8
1979-04-02	NULL
1979-04-03	NULL
1979-04-04	NULL
1979-04-05	5.7
1979-04-06	9.3
1979-04-07	NULL
1979-04-08	NULL
1979-04-09	NULL
1979-04-10	NULL
1979-04-11	NULL
1979-04-12	3.4
1979-04-13	NULL
1979-04-14	NULL
1979-04-15	NULL
1979-04-16	NULL
1979-04-17	8
1979-04-18	NULL
1979-04-19	NULL
1979-04-20	NULL
1979-04-21	NULL
1979-04-22	NULL
1979-04-23	23.3
1979-04-24	NULL
1979-04-25	15.2
1979-04-26	NULL
1979-04-27	2.8
1979-04-28	10.1
1979-04-29	0.2
1979-04-30	5.9
1979-05-01	NULL
1979-05-02	NULL
1979-05-03	0.3
1979-05-04	NULL
1979-05-05	8.4
1979-05-06	14.9
1979-05-07	NULL
1979-05-08	0.9
1979-05-09	NULL
1979-05-10	0.1
1979-05-11	0.8
1979-05-12	41.3
1979-05-13	0.1
1979-05-14	0.6
1979-05-15	NULL
1979-05-16	NULL
1979-05-17	NULL
1979-05-18	NULL
1979-05-19	NULL
1979-05-20	NULL
1979-05-21	NULL
1979-05-22	NULL
1979-05-23	NULL
1979-05-24	NULL
1979-05-25	NULL
1979-05-26	NULL
1979-05-27	NULL
1979-05-28	NULL
1979-05-29	NULL
1979-05-30	NULL
1979-05-31	NULL
1979-06-01	0.9
1979-06-02	0.9
1979-06-03	NULL
1979-06-04	17.8
1979-06-05	0.3
1979-06-06	NULL
1979-06-07	NULL
1979-06-08	NULL
1979-06-09	6.5
1979-06-10	NULL
1979-06-11	NULL
1979-06-12	NULL
1979-06-13	NULL
1979-06-14	NULL
1979-06-15	NULL
1979-06-16	NULL
1979-06-17	NULL
1979-06-18	5.2
1979-06-19	3.6
1979-06-20	10.9
1979-06-21	NULL
1979-06-22	NULL
1979-06-23	41.8
1979-06-24	9.4
1979-06-25	31.1
1979-06-26	NULL
1979-06-27	68.5
1979-06-28	NULL
1979-06-29	NULL
1979-06-30	3.6
1979-07-01	2.7
1979-07-02	15.9
1979-07-03	0.7
1979-07-04	NULL
1979-07-05	1.7
1979-07-06	NULL
1979-07-07	27.1
1979-07-08	15.7
1979-07-09	14.6
1979-07-10	NULL
1979-07-11	NULL
1979-07-12	NULL
1979-07-13	0.1
1979-07-14	NULL
1979-07-15	NULL
1979-07-16	9
1979-07-17	NULL
1979-07-18	NULL
1979-07-19	NULL
1979-07-20	11.6
1979-07-21	63.8
1979-07-22	NULL
1979-07-23	NULL
1979-07-24	0.7
1979-07-25	NULL
1979-07-26	NULL
1979-07-27	NULL
1979-07-28	NULL
1979-07-29	NULL
1979-07-30	NULL
1979-07-31	NULL
1979-08-01	NULL
1979-08-02	NULL
1979-08-03	NULL
1979-08-04	NULL
1979-08-05	NULL
1979-08-06	NULL
1979-08-07	NULL
1979-08-08	NULL
1979-08-09	NULL
1979-08-10	NULL
1979-08-11	NULL
1979-08-12	NULL
1979-08-13	NULL
1979-08-14	1
1979-08-15	NULL
1979-08-16	NULL
1979-08-17	NULL
1979-08-18	NULL
1979-08-19	2.2
1979-08-20	15.8
1979-08-21	NULL
1979-08-22	NULL
1979-08-23	NULL
1979-08-24	NULL
1979-08-25	NULL
1979-08-26	0.3
1979-08-27	25.6
1979-08-28	NULL
1979-08-29	12.3
1979-08-30	0.6
1979-08-31	14.1
1979-09-01	NULL
1979-09-02	NULL
1979-09-03	NULL
1979-09-04	8.7
1979-09-05	40.3
1979-09-06	NULL
1979-09-07	3.4
1979-09-08	NULL
1979-09-09	NULL
1979-09-10	NULL
1979-09-11	NULL
1979-09-12	5.6
1979-09-13	0.8
1979-09-14	0.9
1979-09-15	NULL
1979-09-16	6.4
1979-09-17	0.6
1979-09-18	NULL
1979-09-19	NULL
1979-09-20	NULL
1979-09-21	0.2
1979-09-22	NULL
1979-09-23	10.9
1979-09-24	3.5
1979-09-25	NULL
1979-09-26	NULL
1979-09-27	NULL
1979-09-28	NULL
1979-09-29	NULL
1979-09-30	NULL
1979-10-01	NULL
1979-10-02	NULL
1979-10-03	NULL
1979-10-04	NULL
1979-10-05	NULL
1979-10-06	NULL
1979-10-07	NULL
1979-10-08	NULL
1979-10-09	NULL
1979-10-10	NULL
1979-10-11	NULL
1979-10-12	NULL
1979-10-13	NULL
1979-10-14	NULL
1979-10-15	NULL
1979-10-16	NULL
1979-10-17	NULL
1979-10-18	NULL
1979-10-19	NULL
1979-10-20	NULL
1979-10-21	NULL
1979-10-22	NULL
1979-10-23	NULL
1979-10-24	NULL
1979-10-25	NULL
1979-10-26	NULL
1979-10-27	NULL
1979-10-28	NULL
1979-10-29	NULL
1979-10-30	NULL
1979-10-31	NULL
1979-11-01	NULL
1979-11-02	NULL
1979-11-03	NULL
1979-11-04	0.8
1979-11-05	NULL
1979-11-06	NULL
1979-11-07	NULL
1979-11-08	NULL
1979-11-09	NULL
1979-11-10	NULL
1979-11-11	NULL
1979-11-12	NULL
1979-11-13	NULL
1979-11-14	NULL
1979-11-15	0.4
1979-11-16	9.2
1979-11-17	4.6
1979-11-18	NULL
1979-11-19	NULL
1979-11-20	NULL
1979-11-21	NULL
1979-11-22	NULL
1979-11-23	NULL
1979-11-24	NULL
1979-11-25	NULL
1979-11-26	NULL
1979-11-27	NULL
1979-11-28	NULL
1979-11-29	NULL
1979-11-30	NULL
1979-12-01	NULL
1979-12-02	0.4
1979-12-03	0.9
1979-12-04	0.2
1979-12-05	0.1
1979-12-06	NULL
1979-12-07	NULL
1979-12-08	0.5
1979-12-09	NULL
1979-12-10	NULL
1979-12-11	NULL
1979-12-12	NULL
1979-12-13	NULL
1979-12-14	NULL
1979-12-15	NULL
1979-12-16	NULL
1979-12-17	NULL
1979-12-18	4.7
1979-12-19	0.1
1979-12-20	9.2
1979-12-21	0.7
1979-12-22	16.3
1979-12-23	0.1
1979-12-24	NULL
1979-12-25	NULL
1979-12-26	NULL
1979-12-27	NULL
1979-12-28	NULL
1979-12-29	NULL
1979-12-30	4.3
1979-12-31	36.1
1980-01-01	10.5
1980-01-02	3.9
1980-01-03	4.5
1980-01-04	NULL
1980-01-05	NULL
1980-01-06	NULL
1980-01-07	NULL
1980-01-08	NULL
1980-01-09	NULL
1980-01-10	0.1
1980-01-11	2.6
1980-01-12	0.8
1980-01-13	NULL
1980-01-14	NULL
1980-01-15	NULL
1980-01-16	NULL
1980-01-17	NULL
1980-01-18	NULL
1980-01-19	NULL
1980-01-20	NULL
1980-01-21	NULL
1980-01-22	NULL
1980-01-23	NULL
1980-01-24	NULL
1980-01-25	0.1
1980-01-26	NULL
1980-01-27	4.5
1980-01-28	2.7
1980-01-29	0.1
1980-01-30	NULL
1980-01-31	NULL
1980-02-01	NULL
1980-02-02	NULL
1980-02-03	NULL
1980-02-04	NULL
1980-02-05	NULL
1980-02-06	NULL
1980-02-07	NULL
1980-02-08	NULL
1980-02-09	NULL
1980-02-10	NULL
1980-02-11	NULL
1980-02-12	NULL
1980-02-13	NULL
1980-02-14	NULL
1980-02-15	NULL
1980-02-16	1.3
1980-02-17	3.9
1980-02-18	0.1
1980-02-19	NULL
1980-02-20	NULL
1980-02-21	NULL
1980-02-22	NULL
1980-02-23	NULL
1980-02-24	NULL
1980-02-25	10.2
1980-02-26	0.2
1980-02-27	NULL
1980-02-28	NULL
1980-02-29	10.2
1980-03-01	NULL
1980-03-02	1.3
1980-03-03	12.6
1980-03-04	1.1
1980-03-05	2.3
1980-03-06	2
1980-03-07	11.5
1980-03-08	0.1
1980-03-09	NULL
1980-03-10	3.7
1980-03-11	3.7
1980-03-12	2.9
1980-03-13	0.4
1980-03-14	NULL
1980-03-15	NULL
1980-03-16	NULL
1980-03-17	0.2
1980-03-18	NULL
1980-03-19	1.3
1980-03-20	14.7
1980-03-21	14.2
1980-03-22	NULL
1980-03-23	1.2
1980-03-24	NULL
1980-03-25	NULL
1980-03-26	NULL
1980-03-27	0.2
1980-03-28	8.6
1980-03-29	NULL
1980-03-30	7.8
1980-03-31	4.7
1980-04-01	NULL
1980-04-02	NULL
1980-04-03	NULL
1980-04-04	NULL
1980-04-05	6.3
1980-04-06	NULL
1980-04-07	0.8
1980-04-08	NULL
1980-04-09	NULL
1980-04-10	NULL
1980-04-11	3
1980-04-12	5.5
1980-04-13	12.7
1980-04-14	NULL
1980-04-15	NULL
1980-04-16	NULL
1980-04-17	NULL
1980-04-18	NULL
1980-04-19	NULL
1980-04-20	NULL
1980-04-21	NULL
1980-04-22	NULL
1980-04-23	NULL
1980-04-24	13.8
1980-04-25	NULL
1980-04-26	4.6
1980-04-27	1.9
1980-04-28	NULL
1980-04-29	NULL
1980-04-30	NULL
1980-05-01	NULL
1980-05-02	NULL
1980-05-03	NULL
1980-05-04	NULL
1980-05-05	NULL
1980-05-06	1.1
1980-05-07	NULL
1980-05-08	NULL
1980-05-09	NULL
1980-05-10	NULL
1980-05-11	11.9
1980-05-12	NULL
1980-05-13	13.7
1980-05-14	4
1980-05-15	NULL
1980-05-16	NULL
1980-05-17	NULL
1980-05-18	4.7
1980-05-19	0.4
1980-05-20	NULL
1980-05-21	NULL
1980-05-22	NULL
1980-05-23	5
1980-05-24	6.6
1980-05-25	0.6
1980-05-26	NULL
1980-05-27	NULL
1980-05-28	NULL
1980-05-29	NULL
1980-05-30	NULL
1980-05-31	25.5
1980-06-01	NULL
1980-06-02	NULL
1980-06-03	NULL
1980-06-04	NULL
1980-06-05	NULL
1980-06-06	1.6
1980-06-07	0.3
1980-06-08	NULL
1980-06-09	28.2
1980-06-10	1.4
1980-06-11	1
1980-06-12	0.2
1980-06-13	NULL
1980-06-14	NULL
1980-06-15	NULL
1980-06-16	15.8
1980-06-17	3.8
1980-06-18	10.9
1980-06-19	23.7
1980-06-20	3.2
1980-06-21	NULL
[truncated: 23,859 more rows]
